# Supplementary material for: Merging Information From Infrared and Autofluorescence Fundus Images for Monitoring of Chorioretinal Atrophic Lesions
Source: PubMed Central journal article supplement (PMC7453042; doi:10.1167/tvst.9.9.38), 2020-08-25

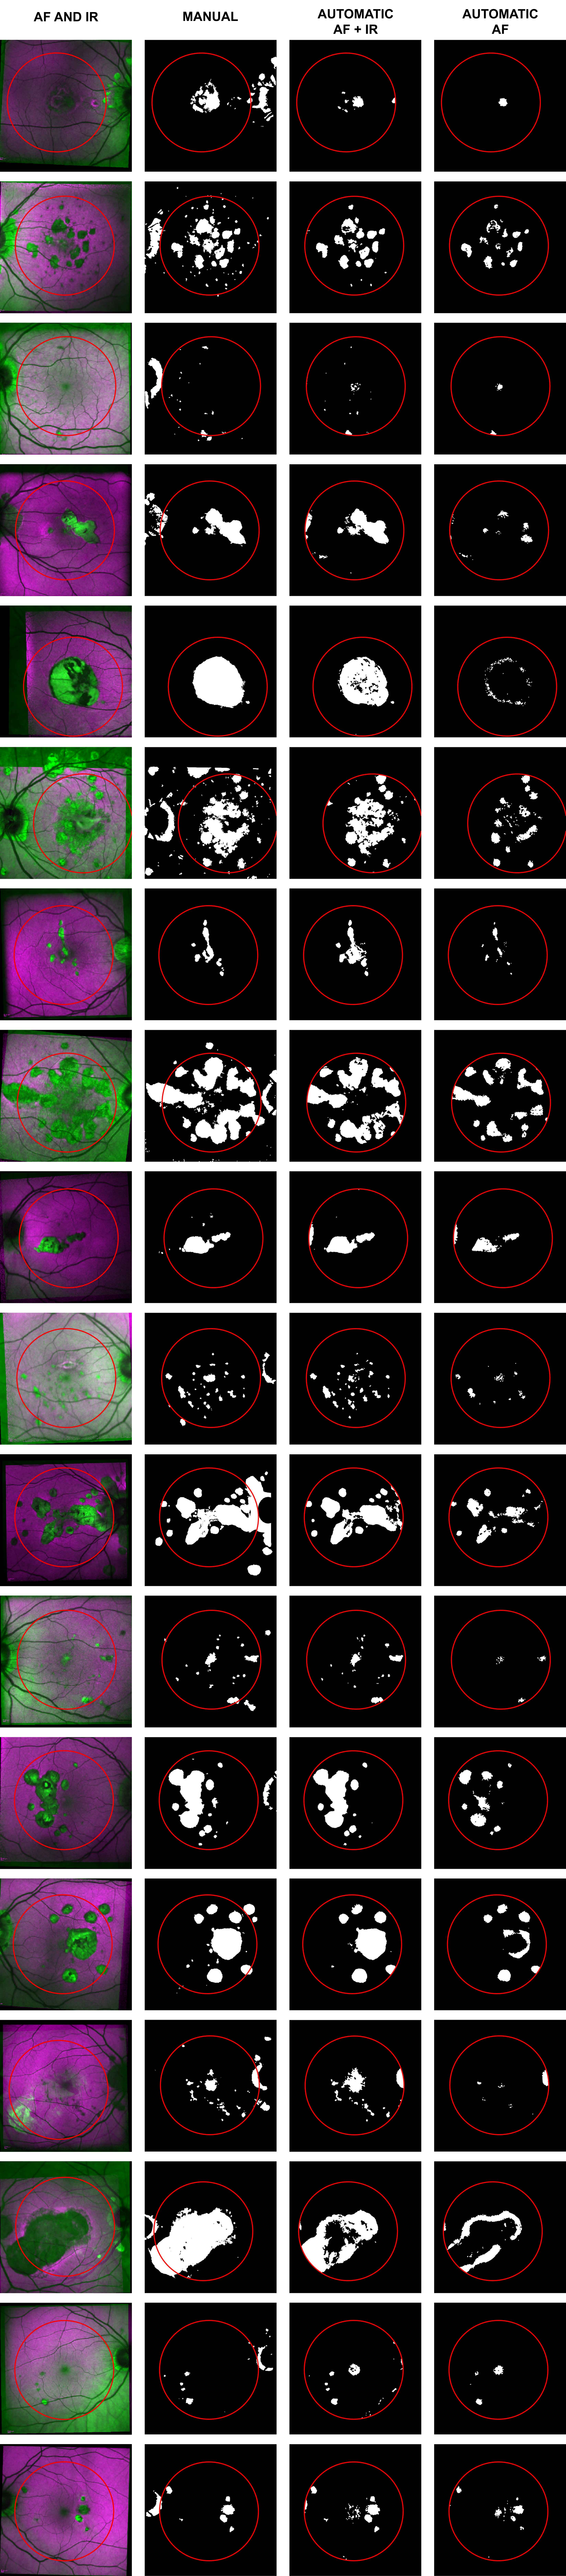

Supplement: tvst-9-9-38_s001.pdf [file tvst-9-9-38_s001.pdf]
